# Supplementary material for: Rbf Activates the Myogenic Transcriptional Program to Promote Skeletal Muscle Differentiation
Source: PubMed Central journal article supplement — Cell Rep. Author manuscript; Available in PMC 2019 Jan 23. (PMC6344057; doi:10.1016/j.celrep.2018.12.080), 2019-01-15
Supplement: NIHMS1518823-supplement-1.pdf [file NIHMS1518823-supplement-1.pdf]

**Cell Reports, Volume 26**

**Supplemental Information**

**Rbf Activates the Myogenic Transcriptional Program  
to Promote Skeletal Muscle Differentiation**

**Maria Paula Zappia, Alice Rogers, Abul B.M.M.K. Islam, and Maxim V. Frolov**

SUPPLEMENTAL INFORMATION

SUPPLEMENTAL FIGURES:

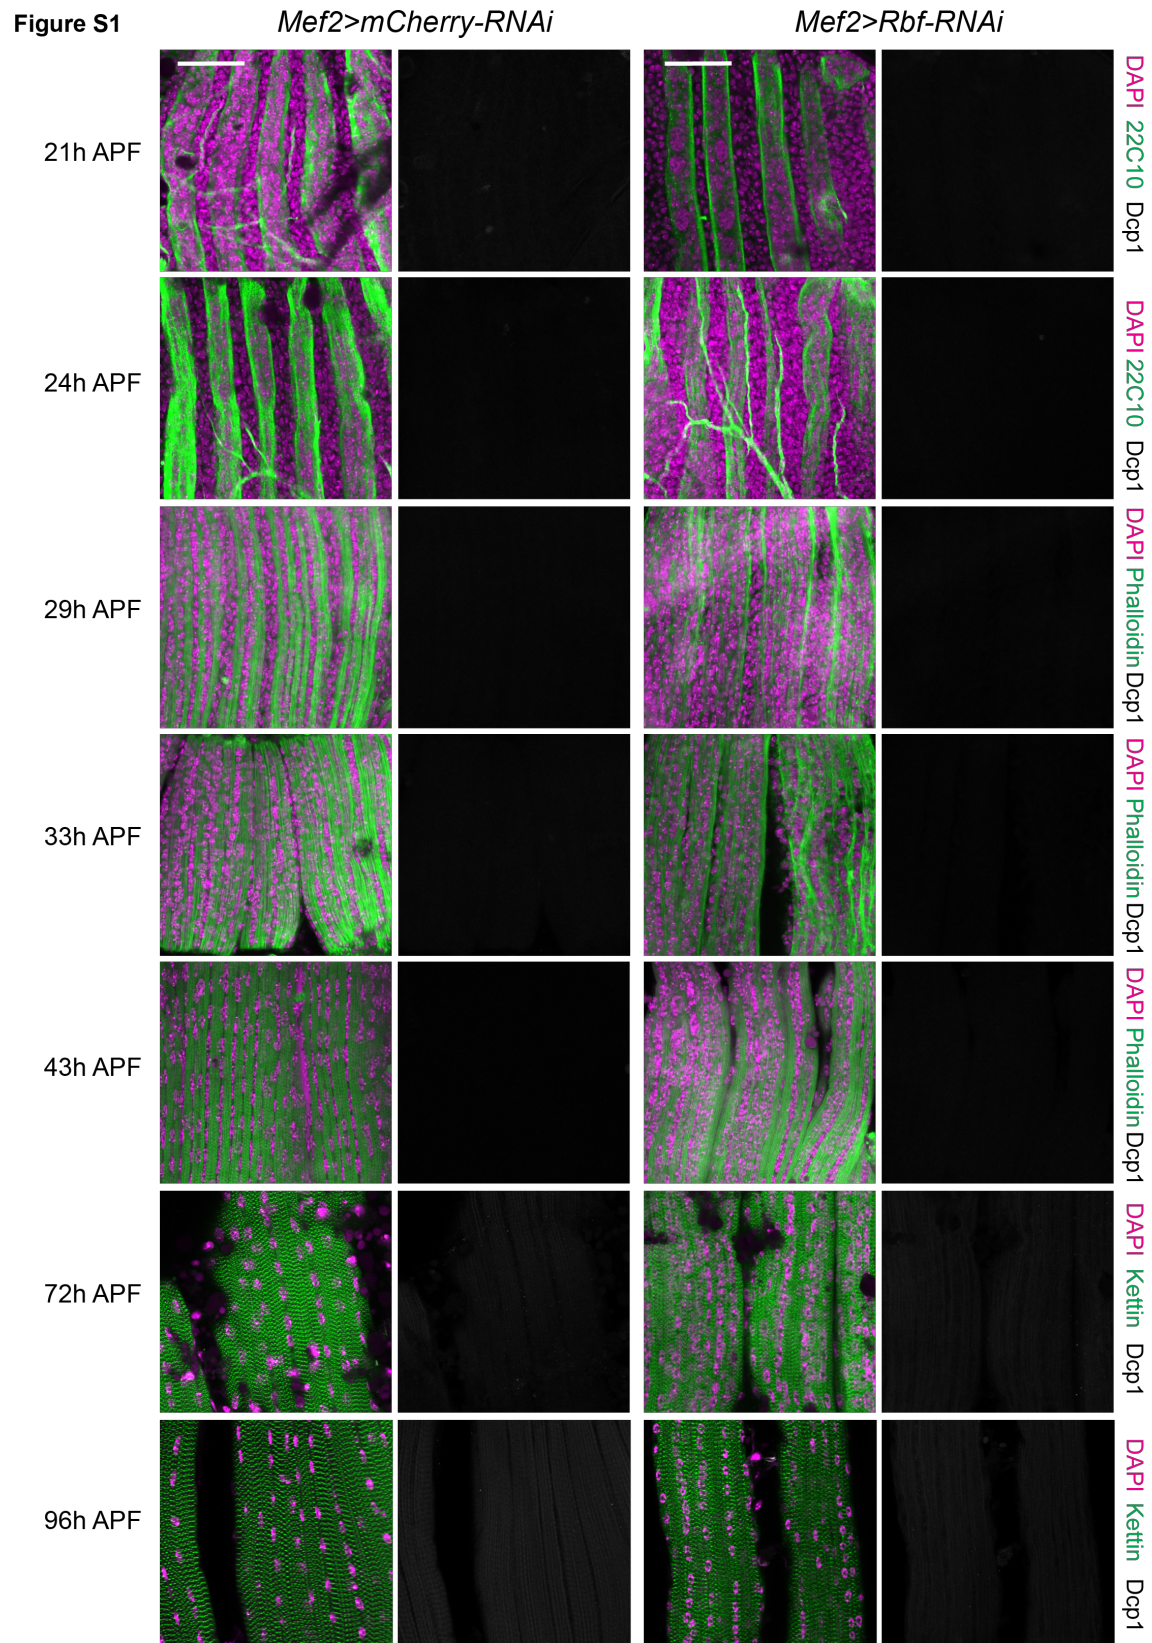

**Figure S1: The loss of Rbf does not induce apoptosis mediated by dcp1 in developing indirect flight muscles. Related to Figure 2.**

Developing DLMS stained over time from 21 to 96 h APF. Apoptotic cells were marked using anti-dcp1 antibody (right panel). Overall structure was analyzed using DAPI and Phalloidin or 22c10 to mark developing IFM or Kettin to stain sarcomere depending on the developmental stages (left panel). Single confocal sections are shown. Scale 40  $\mu\text{m}$ . Full genotypes are *w*-, *UAS-Dicer2*; +; *Mef2-GAL4/UAS-mCherry-RNAi* (left panel) and *w*-, *UAS-Dicer2*; +; *Mef2-GAL4/UAS-Rbf-RNAi* (right panel)

## Figure S2

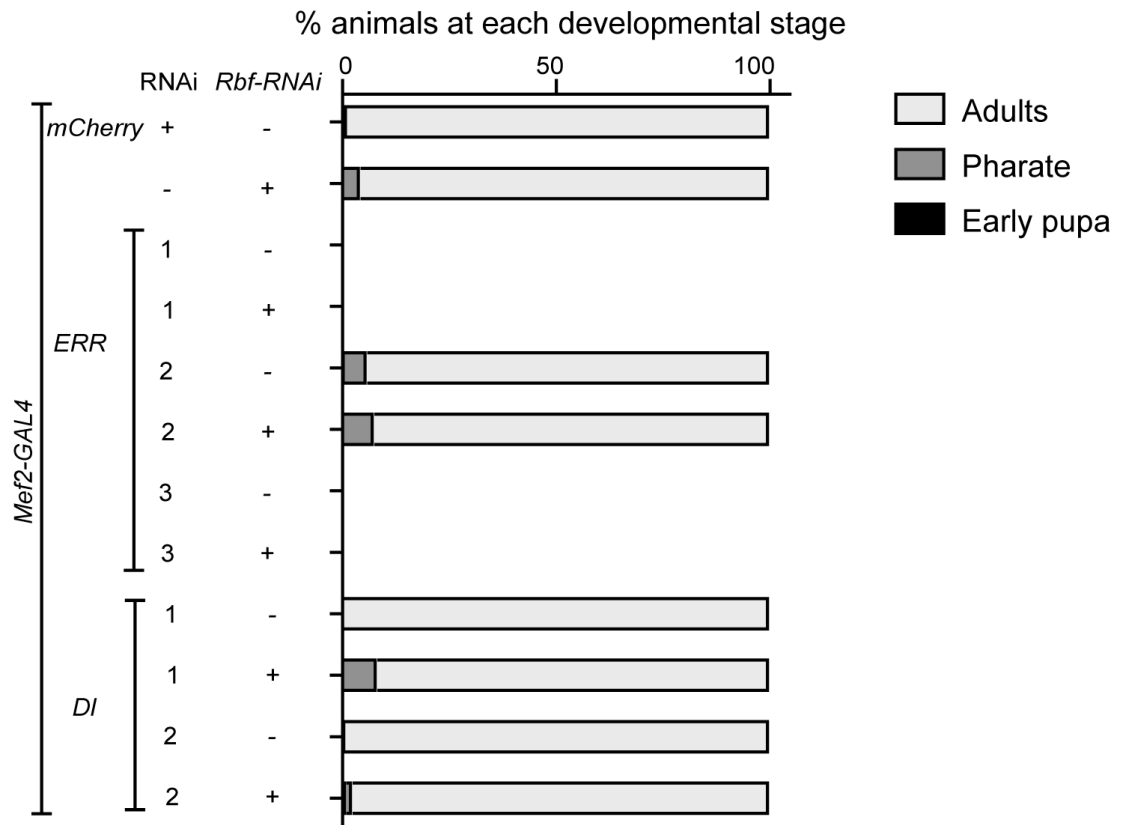

**Figure S2: Rbf interacts with other transcription factors. Related to Figure 7.**

Genetic interactions between Rbf and candidates were analyzed by knocking down the expression of each gene with or without *Rbf-RNAi* in muscles using *Mef2-GAL4* driver. The candidates tested are estrogen-related receptor (ERR) and Delta (DI). Lethality during pupa development was analyzed as % animals scored at each developmental stage. Adults: light grey, Pharate: grey, Early pupa: dark grey. N= 94 - 319 flies per genotype. Two independent experiments. Genotypes are *Mef2-GAL4/UAS-mCherry-RNAi*, *UAS-Rbf-RNAi/Mef2-GAL4*, three RNAi lines were used for ERR (1: *UAS-ERR-RNAi<sup>HMJ23520</sup>*, 2: *UAS-ERR-RNAi<sup>JF02431</sup>* and 3: *UAS-ERR-RNAi<sup>HMC03087</sup>*), and two for DI (1: *UAS-DI-RNAi<sup>GD1238</sup>* and 2: *UAS-DI-RNAi<sup>JF02825</sup>*).

SUPPLEMENTAL TABLES:

Table S7: Primer sequence. Related to STAR Methods

| Gene                     | Forward primer sequence                                 | Reverse primer sequence                                 | Application |
|--------------------------|---------------------------------------------------------|---------------------------------------------------------|-------------|
| <i>twi</i>               | AAGCTCAGCAAGATCCAGACC                                   | GAGCTGGCCGATCCATACG                                     | RT-qPCR     |
| <i>Mef2</i>              | CGGATATCATGAGCCTCAACAC                                  | CGTGGAACCATTGCTATTCTGC                                  | RT-qPCR     |
| <i>htl</i>               | AACGCATCGAAACCGTTCAC                                    | TGGTGCCTGTTTCTGTATC                                     | RT-qPCR     |
| <i>stumps</i>            | AACAAGGTGGTTGCTCTGCT                                    | ACTGCAGGGTGTAGGGATTG                                    | RT-qPCR     |
| <i>Act88F</i>            | ATGGTGGGTATGGGTCAGAA                                    | CTTCTCCATGTCGTCCCAGT                                    | RT-qPCR     |
| <i>Mhc</i>               | AAGAACGACCTCGAGAACCAG                                   | TCGGCCTTCTTCTTGCTG                                      | RT-qPCR     |
| <i>fln</i>               | GGCAAAGAGGGACAAACAAC                                    | ACTACGAGTGCTCATCCGTTT                                   | RT-qPCR     |
| <i>RpL32</i>             | TACAGGCCCAAGATCGTGAAG                                   | GACGCACTCTGTTGTCGATACC                                  | RT-qPCR     |
| <i>RpL30</i>             | GCAAATACTGCCTGGGCTAC                                    | ACTTCAGTCTTGGCCAGCAT                                    | RT-qPCR     |
| <i>Lmpt-transcript K</i> | AGTGGCTGCCCTAAAACAAC                                    | ATTGCTCCTCTGCTGCGATAG                                   | RT-qPCR     |
| <i>sals</i>              | GCAAGCCATGAAGAAGAACCAG                                  | TCGTCTTCGTCTAGCTTCATGG                                  | RT-qPCR     |
| <i>Tm1-transcript H</i>  | ATAAGCAGCCGCAGCAAAAAG                                   | TTTCTGCTGCCTCTGTTTTCG                                   | RT-qPCR     |
| <i>Tm2</i>               | TCCAAGATCATGGAGCTGGAG                                   | TTCATCTCGCGCTTGAAGTC                                    | RT-qPCR     |
| <i>Mlc2</i>              | TTCTCTGTGTTCTCCAGAAGC                                   | TTGTCCGCATCCATGAGTTG                                    | RT-qPCR     |
| <i>how</i>               | ATCTGTCCGATGACCTGCATG                                   | TTAGCTCATCTTCGCCTTCGG                                   | RT-qPCR     |
| <i>salm</i>              | ACTACAGGAGCCACACCAAAG                                   | ATGTGTTGCTTCAGGTTGCC                                    | RT-qPCR     |
| <i>Rbf</i>               | AACAACGTGAAGCAGCTGAG                                    | ACTTGGCGAGGAATTTCTGC                                    | RT-qPCR     |
| <i>P5CDh1 157/40</i>     | TATTCGGCGCTTTTCCACTG                                    | ACAAAGGCACACCACACTTC                                    | ChIP-qPCR   |
| <i>Cyt-c-p -496/-372</i> | AAAGATGGTGTTCGCAGGTC                                    | TGGCCGATCTTGTTGTTTCG                                    | ChIP-qPCR   |
| <i>Zasp66 -847/-712</i>  | TCGAAAACCTCTGCACATCGG                                   | GGGCCACAGGATTTAATTGACC                                  | ChIP-qPCR   |
| <i>Negative site</i>     | TGTGTATGCCTTGCTTGCAC                                    | TCTATGCACACGCTCTACTGAG                                  | ChIP-qPCR   |
| <i>Rbf</i>               | <u>CTAATACGACTCACTATAGGGAGCG</u><br>AATTTCGACGAACGCATTC | <u>CTAATACGACTCACTATAGGGA</u><br>GCAGCCAAGCAGGTACACCTTG | dsRNA       |
| <i>GFP</i>               | <u>CTAATACGACTCACTATAGGGAGCG</u><br>TAAACGGCCACAAGTTCAG | <u>CTAATACGACTCACTATAGGGA</u><br>GACGAACTCCAGCAGGACCATG | dsRNA       |

\* T7 sequence is underlined

**Table S7: Primer sequences.** Sequence of primers used to measure gene expression (RT-qPCR), genomic occupancy (ChIP-qPCR) and primers used to make dsRNA.
